# Supplementary material
Source: PubMed Central journal article supplement (PMC2843233)

# Supplementary data.

Figure 1. MgSO<sub>4</sub> and CuSO<sub>4</sub> exert no effect on PTEN protein levels as determined by Western blot analysis.

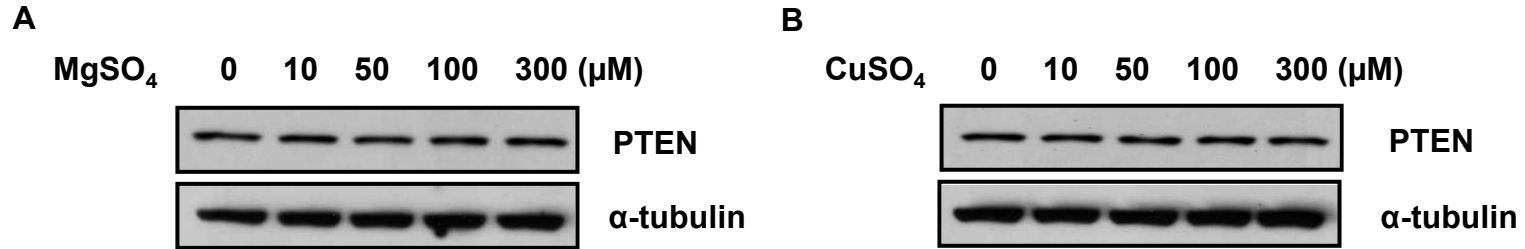

Figure 2. Zinc does not affect NEDD4-1 protein stability as measured by the CHX chase assay.

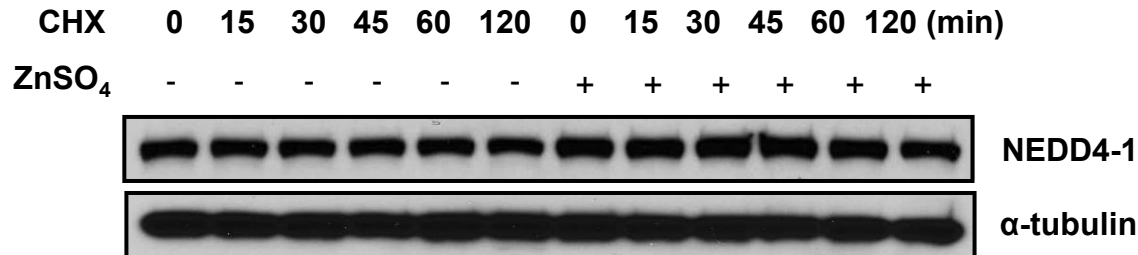

## Supplementary data.

Figure 3. Effect of lower concentrations of sh PTEN on PTEN/NEDD4-1 protein levels.

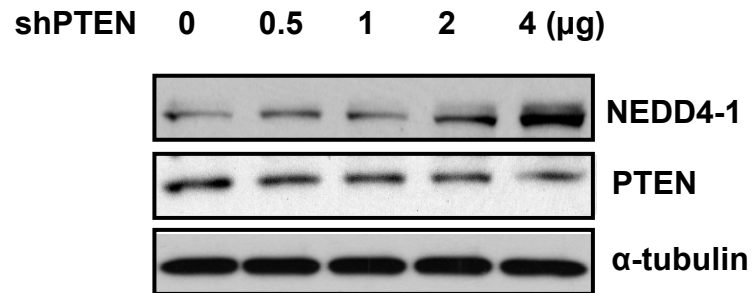

Figure 4. Acute effect of zinc on NEDD4-1 protein level.

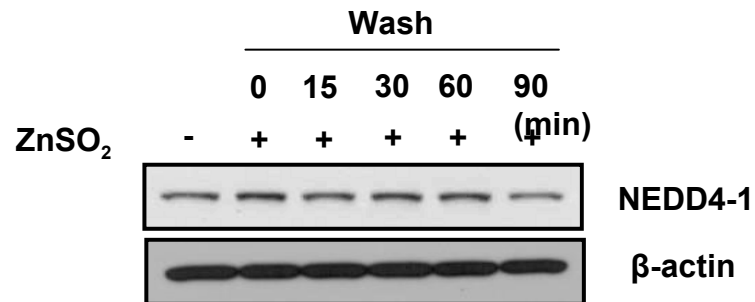

Supplement: supp_M109.091637_jbc.M109.091637-1.pdf [file supp_M109.091637_jbc.M109.091637-1.pdf]
